# Supplementary material for: Identification of 4-Genes Model in Papillary Renal Cell Tumor Microenvironment Based on Comprehensive Analysis
Source: Research Square preprint supplement (doi:10.21203/rs.3.rs-138186/v1), 2021-01-07
Supplement: Supplementary file 1 [file 6a80c4d6addd90749859af2f.docx]

Title: Identification of 4-genes model in papillary renal cell tumor microenvironment based on comprehensive analysis

Liang Luo1*, Haiyi Zhou2, Hao Su1

1 Department of Urology, The Third Affiliated Hospital, Sun Yat-sen University, Guangzhou, 510630, China

2 Department of Gynecology of traditional Chinese Medicine, Shanxi Academy of Traditional Chinese Medicine, Taiyuan 030000, China

Corresponding author:

Liang Luo, Department of Urology, The Third Affiliated Hospital, Sun Yat-sen University, Tianhe Road 600, Guangzhou, 510630, China

Telephone: +86-20-85252990; Fax: +86-20-85252678

E-mail: luoliang6@mail2.sysu.edu.cn

**Supplementary Table S3**

**Univariate and multivariate cox proportional hazard regression analysis of 22 genes based on TCGA database**

| Gene | Univariate | | Multivariate | |
| --- | --- | --- | --- | --- |
| HR | P | HR | P |
| CXCR5 | 1.233632 | 0.013465 |  |  |
| CD19 | 1.151194 | 0.019804 |  |  |
| PDCD1 | 1.279521 | 0.001284 |  |  |
| IL21R | 1.300843 | 0.002321 |  |  |
| GZMB | 1.29393 | 0.001287 |  |  |
| TNFRSF9 | 1.254914 | 0.001801 |  |  |
| CD38 | 1.271727 | 0.004488 |  |  |
| CXCL10 | 1.233098 | 0.0064 |  |  |
| SELL | 1.319797 | 0.008861 |  |  |
| LAG3 | 1.234082 | 0.002357 |  |  |
| CD44 | 1.210629 | 0.048175 |  |  |
| CD80 | 1.358777 | 0.007572 |  |  |
| CCL21 | 1.15497 | 0.001443 |  |  |
| ITGA4 | 1.333624 | 0.018644 |  |  |
| CCL19 | 1.206037 | 2.77E-05 | 0.17997 | 0.020823 |
| IL6 | 1.171632 | 0.004977 | 0.12025 | 0.062824 |
| CXCL13 | 1.238469 | 3.79E-06 | 0.22031 | 0.000914 |
| BLK | 1.18704 | 0.018914 |  |  |
| CD79A | 1.1366 | 0.020603 | -0.2402 | 0.014912 |
| FCRLA | 1.176055 | 0.027419 |  |  |
| MS4A1 | 1.183299 | 0.012594 |  |  |
| POU2AF1 | 1.162626 | 0.005986 |  |  |
